# Supplementary material for: Cardiovascular and Renal Comorbidities Included into Neural Networks Predict the Outcome in COVID-19 Patients Admitted to an Intensive Care Unit: Three-Center, Cross-Validation, Age- and Sex-Matched Study
Source: MDPI journal article supplement (doi:10.3390/jcdd10020039), 2023-01-23
Supplement: s1 [file s1]

**Table S1.** Optimal parameters for the best models with regards to each machine learning approach.

| Model                                                       | Parameters                 | Best Value |
|-------------------------------------------------------------|----------------------------|------------|
| Decision trees<br>(sklearn.tree.DecisionTreeClassifier)     | 'ccp_alpha'                | 0          |
|                                                             | 'class_weight'             | None       |
|                                                             | 'criterion'                | 'entropy'  |
|                                                             | 'max_depth'                | 4          |
|                                                             | 'max_features'             | None       |
|                                                             | 'max_leaf_nodes'           | None       |
|                                                             | 'min_impurity_decrease'    | 0          |
|                                                             | 'min_samples_leaf'         | 1          |
|                                                             | 'min_samples_split'        | 2          |
|                                                             | 'min_weight_fraction_leaf' | 0          |
|                                                             | 'random_state'             | 1236       |
|                                                             | 'splitter'                 | 'best'     |
| Random forests<br>(sklearn.ensemble.RandomForestClassifier) | 'bootstrap'                | True       |
|                                                             | 'ccp_alpha'                | 0          |
|                                                             | 'class_weight'             | None       |
|                                                             | 'criterion'                | 'gini'     |
|                                                             | 'max_depth'                | 6          |
|                                                             | 'max_features'             | 0.8        |
|                                                             | 'max_leaf_nodes'           | None       |
|                                                             | 'max_samples'              | None       |
|                                                             | 'min_impurity_decrease'    | 0          |
|                                                             | 'min_samples_leaf'         | 1          |
|                                                             | 'min_samples_split'        | 30         |
|                                                             | 'min_weight_fraction_leaf' | 0          |
|                                                             | 'n_estimators'             | 200        |
|                                                             | 'n_jobs'                   | -1         |
|                                                             | 'oob_score'                | False      |
|                                                             | 'random_state'             | 1236       |
|                                                             | 'verbose'                  | 0          |
|                                                             | 'warm_start'               | True       |
| Extra trees<br>(sklearn.ensemble.ExtraTreesClassifier)      | 'bootstrap'                | False      |
|                                                             | 'ccp_alpha'                | 0          |
|                                                             | 'class_weight'             | None       |
|                                                             | 'criterion'                | 'entropy'  |
|                                                             | 'max_depth'                | 7          |
|                                                             | 'max_features'             | 0.6        |
|                                                             | 'max_leaf_nodes'           | None       |
|                                                             | 'max_samples'              | None       |
|                                                             | 'min_impurity_decrease'    | 0          |
|                                                             | 'min_samples_leaf'         | 1          |
|                                                             | 'min_samples_split'        | 50         |
|                                                             | 'min_weight_fraction_leaf' | 0          |
|                                                             | 'n_estimators'             | 200        |
|                                                             | 'n_jobs'                   | -1         |
|                                                             | 'oob_score'                | False      |

|                                                                  |                           |                   |
|------------------------------------------------------------------|---------------------------|-------------------|
|                                                                  | 'random_state'            | 1238              |
|                                                                  | 'verbose'                 | 0                 |
|                                                                  | 'warm_start'              | True              |
| Neural networks<br>(sklearn.neural_network.MLPClassifier)        | 'activation'              | 'relu'            |
|                                                                  | 'alpha'                   | 0.0001            |
|                                                                  | 'batch_size'              | 'auto'            |
|                                                                  | 'beta_1'                  | 0.9               |
|                                                                  | 'beta_2'                  | 0.999             |
|                                                                  | 'early_stopping'          | True              |
|                                                                  | 'epsilon'                 | 1.00E-08          |
|                                                                  | 'hidden_layer_sizes'      | (16, 32)          |
|                                                                  | 'learning_rate'           | 'constant'        |
|                                                                  | 'learning_rate_init'      | 0.1               |
|                                                                  | 'max_fun'                 | 15000             |
|                                                                  | 'max_iter'                | 500               |
|                                                                  | 'momentum'                | 0.9               |
|                                                                  | 'n_iter_no_change'        | 50                |
|                                                                  | 'nesterovs_momentum'      | True              |
|                                                                  | 'power_t'                 | 0.5               |
|                                                                  | 'random_state'            | 1243              |
|                                                                  | 'shuffle'                 | True              |
|                                                                  | 'solver'                  | 'adam'            |
|                                                                  | 'tol'                     | 0.0001            |
|                                                                  | 'validation_fraction'     | 0.1               |
|                                                                  | 'verbose'                 | False             |
|                                                                  | 'warm_start'              | False             |
| K-nearest neighbours<br>(sklearn.neighbors.KNeighborsClassifier) | 'algorithm'               | 'kd_tree'         |
|                                                                  | 'leaf_size'               | 30                |
|                                                                  | 'metric'                  | 'minkowski'       |
|                                                                  | 'metric_params'           | None              |
|                                                                  | 'n_jobs'                  | -1                |
|                                                                  | 'n_neighbors'             | 7                 |
|                                                                  | 'p'                       | 2                 |
|                                                                  | 'weights'                 | 'distance'        |
| XGBoost<br>(XGBoost.XGBClassifier)                               | 'objective'               | 'binary logistic' |
|                                                                  | 'base_score'              | 0.5               |
|                                                                  | 'booster'                 | 'gbtree'          |
|                                                                  | 'colsample_bylevel'       | 1                 |
|                                                                  | 'colsample_bynode'        | 1                 |
|                                                                  | 'colsample_bytree'        | 1                 |
|                                                                  | 'eval_metric'             | None              |
|                                                                  | 'gamma'                   | 0                 |
|                                                                  | 'gpu_id'                  | -1                |
|                                                                  | 'grow_policy'             | 'depthwise'       |
|                                                                  | 'interaction_constraints' | "                 |
|                                                                  | 'learning_rate'           | 0.300000012       |
|                                                                  | 'max_bin'                 | 256               |
|                                                                  | 'max_cat_to_onehot'       | 4                 |

|                                    |                           |           |
|------------------------------------|---------------------------|-----------|
|                                    | 'max_delta_step'          | 0         |
|                                    | 'max_depth'               | 6         |
|                                    | 'max_leaves'              | 0         |
|                                    | 'min_child_weight'        | 1         |
|                                    | 'monotone_constraints'    | ('')      |
|                                    | 'n_jobs'                  | 0         |
|                                    | 'num_parallel_tree'       | 1         |
|                                    | 'predictor'               | 'auto'    |
|                                    | 'random_state'            | 0         |
|                                    | 'reg_alpha'               | 0         |
|                                    | 'reg_lambda'              | 1         |
|                                    | 'sampling_method'         | 'uniform' |
|                                    | 'scale_pos_weight'        | 1         |
|                                    | 'subsample'               | 1         |
|                                    | 'tree_method'             | 'auto'    |
|                                    | 'validate_parameters'     | 1         |
|                                    | 'verbosity'               | None      |
| LightGBM (lightgbm.LGBMClassifier) | 'bagging_fraction'        | 0.5       |
|                                    | 'bagging_freq'            | 0         |
|                                    | 'bagging_seed'            | 31935     |
|                                    | 'boosting'                | 'gbdt'    |
|                                    | 'cat_smooth'              | 10        |
|                                    | 'cegb_penalty_split'      | 0         |
|                                    | 'cegb_tradeoff'           | 1         |
|                                    | 'data_random_seed'        | 4087      |
|                                    | 'deterministic'           | 0         |
|                                    | 'device_type'             | 'cpu'     |
|                                    | 'drop_rate'               | 0.1       |
|                                    | 'early_stopping_round'    | 0         |
|                                    | 'extra_seed'              | 31278     |
|                                    | 'extra_trees'             | 0         |
|                                    | 'feature_fraction'        | 0.5       |
|                                    | 'feature_fraction_bynode' | 1         |
|                                    | 'feature_fraction_seed'   | 22066     |
|                                    | 'first_metric_only'       | 0         |
|                                    | 'force_col_wise'          | 0         |
|                                    | 'force_row_wise'          | 0         |
|                                    | 'histogram_pool_size'     | -1        |
|                                    | 'lambda_l1'               | 0         |
|                                    | 'lambda_l2'               | 0         |
|                                    | 'learning_rate'           | 0.05      |
|                                    | 'linear_lambda'           | 0         |
|                                    | 'max_cat_threshold'       | 32        |
|                                    | 'max_cat_to_onehot'       | 4         |
|                                    | 'max_delta_step'          | 0         |
|                                    | 'max_depth'               | -1        |
|                                    | 'max_drop'                | 50        |
|                                    | 'min_data_in_leaf'        | 15        |

|                                        |                                 |                 |
|----------------------------------------|---------------------------------|-----------------|
|                                        | 'min_data_per_group'            | 100             |
|                                        | 'min_sum_hessian_in_leaf'       | 0.001           |
|                                        | 'monotone_constraints_method'   | 'basic'         |
|                                        | 'monotone_penalty'              | 0               |
|                                        | 'neg_bagging_fraction'          | 1               |
|                                        | 'num_iterations'                | 10000           |
|                                        | 'num_leaves'                    | 127             |
|                                        | 'num_threads'                   | 0               |
|                                        | 'objective'                     | 'binary'        |
|                                        | 'other_rate'                    | 0.1             |
|                                        | 'path_smooth'                   | 0               |
|                                        | 'pos_bagging_fraction'          | 1               |
|                                        | 'refit_decay_rate'              | 0.9             |
|                                        | 'saved_feature_importance_type' | 0               |
|                                        | 'skip_drop'                     | 0.5             |
|                                        | 'top_k'                         | 20              |
|                                        | 'top_rate'                      | 0.2             |
|                                        | 'tree_learner'                  | 'serial'        |
|                                        | 'verbosity'                     | -1              |
| CatBoost (catboost.CatBoostClassifier) | 'nan_mode'                      | 'Min'           |
|                                        | 'eval_metric'                   | 'AUC'           |
|                                        | 'iterations'                    | 1000            |
|                                        | 'sampling_frequency'            | 'PerTree'       |
|                                        | 'leaf_estimation_method'        | 'Newton'        |
|                                        | 'od_pval'                       | 0               |
|                                        | 'grow_policy'                   | 'SymmetricTree' |
|                                        | 'penalties_coefficient'         | 1               |
|                                        | 'boosting_type'                 | 'Plain'         |
|                                        | 'model_shrink_mode'             | 'Constant'      |
|                                        | 'feature_border_type'           | 'GreedyLogSum'  |
|                                        | 'bayesian_matrix_reg'           | 0.100000002     |
|                                        | 'eval_fraction'                 | 0               |
|                                        | 'force_unit_auto_pair_weights'  | False           |
|                                        | 'l2_leaf_reg'                   | 1.863051295     |
|                                        | 'random_strength'               | 5.292492867     |
|                                        | 'od_type'                       | 'Iter'          |
|                                        | 'rsm'                           | 0.116269194     |
|                                        | 'boost_from_average'            | False           |
|                                        | 'model_size_reg'                | 0.5             |
|                                        | 'pool_metainfo_options'         | {'tags' {}}     |
|                                        | 'subsample'                     | 0.800000012     |
|                                        | 'use_best_model'                | True            |
|                                        | 'od_wait'                       | 50              |
|                                        | 'class_names'                   | [0,1]           |
|                                        | 'random_seed'                   | 1234            |
|                                        | 'depth'                         | 3               |
|                                        | 'posterior_sampling'            | False           |
|                                        | 'border_count'                  | 254             |

|                                                                               |                                     |                  |
|-------------------------------------------------------------------------------|-------------------------------------|------------------|
|                                                                               | 'classes_count'                     | 0                |
|                                                                               | 'auto_class_weights'                | 'None'           |
|                                                                               | 'sparse_features_conflict_fraction' | 0                |
|                                                                               | ,                                   |                  |
|                                                                               | 'leaf_estimation_backtracking'      | 'AnyImprovement' |
|                                                                               | 'best_model_min_trees'              | 1                |
|                                                                               | 'model_shrink_rate'                 | 0                |
|                                                                               | 'min_data_in_leaf'                  | 65               |
|                                                                               | 'loss_function'                     | 'Logloss'        |
|                                                                               | 'learning_rate'                     | 0.100000002      |
|                                                                               | 'score_function'                    | 'Cosine'         |
|                                                                               | 'task_type'                         | 'CPU'            |
|                                                                               | 'leaf_estimation_iterations'        | 10               |
|                                                                               | 'bootstrap_type'                    | 'MVS'            |
|                                                                               | 'max_leaves'                        | 8                |
| Multivariate logistic regression<br>(sklearn.linear_model.LogisticRegression) | 'C'                                 | 1                |
|                                                                               | 'class_weight'                      | None             |
|                                                                               | 'dual'                              | False            |
|                                                                               | 'fit_intercept'                     | True             |
|                                                                               | 'intercept_scaling'                 | 1                |
|                                                                               | 'l1_ratio'                          | None             |
|                                                                               | 'max_iter'                          | 500              |
|                                                                               | 'multi_class'                       | 'auto'           |
|                                                                               | 'n_jobs'                            | -1               |
|                                                                               | 'penalty'                           | 'l2'             |
|                                                                               | 'random_state'                      | None             |
|                                                                               | 'solver'                            | 'lbfgs'          |
|                                                                               | 'tol'                               | 0.0005           |
|                                                                               | 'verbose'                           | 0                |
|                                                                               | 'warm_start'                        | False            |

**Table S2.** Correlation matrix of continuous predictors of COVID-19-related death in patients who has been admitted to the intensive care unit (ICU) because of severe COVID-19.

| Parameters                            | Age,<br>years | WBC,<br>×<br>10 <sup>9</sup> /L | NE#,<br>×<br>10 <sup>9</sup> /L | LY#,<br>×<br>10 <sup>9</sup> /L | NLR          | PLT,<br>×<br>10 <sup>9</sup> /L | BUN,<br>mmol/L | sCr,<br>μmol/L | GFR,<br>mL/min/<br>/1.73 m <sup>2</sup> | AST,<br>U/L | ALT,<br>U/L | FPG,<br>mmol/L | CRP,<br>mg/L | D-dimer,<br>ng/mL |
|---------------------------------------|---------------|---------------------------------|---------------------------------|---------------------------------|--------------|---------------------------------|----------------|----------------|-----------------------------------------|-------------|-------------|----------------|--------------|-------------------|
| Age, years                            | 1.00          | -0.08                           | -0.11                           | -0.03                           | -0.03        | -0.10                           | 0.18           | 0.23           | <b>-0.44</b>                            | -0.22       | -0.27       | 0.07           | -0.09        | -0.07             |
| WBC, × 10 <sup>9</sup> /L             | -0.08         | 1.00                            | <b>0.92</b>                     | 0.13                            | <b>0.51</b>  | 0.28                            | <b>0.31</b>    | 0.09           | -0.01                                   | 0.15        | 0.12        | 0.08           | 0.12         | 0.23              |
| NE#, × 10 <sup>9</sup> /L             | -0.11         | <b>0.92</b>                     | 1.00                            | -0.03                           | <b>0.67</b>  | 0.24                            | <b>0.32</b>    | 0.11           | -0.02                                   | 0.18        | 0.14        | 0.12           | 0.19         | 0.25              |
| LY#, × 10 <sup>9</sup> /L             | -0.03         | 0.13                            | -0.03                           | 1.00                            | <b>-0.72</b> | 0.16                            | -0.03          | -0.04          | 0.06                                    | 0.00        | 0.04        | -0.20          | -0.22        | -0.06             |
| NLR                                   | -0.03         | <b>0.51</b>                     | <b>0.67</b>                     | <b>-0.72</b>                    | 1.00         | 0.02                            | 0.21           | 0.09           | -0.06                                   | 0.11        | 0.05        | 0.20           | 0.27         | 0.17              |
| PLT, × 10 <sup>9</sup> /L             | -0.10         | 0.28                            | 0.24                            | 0.16                            | 0.02         | 1.00                            | -0.07          | -0.14          | 0.11                                    | -0.02       | 0.07        | -0.04          | 0.07         | 0.08              |
| BUN, mmol/L                           | 0.18          | <b>0.31</b>                     | <b>0.32</b>                     | -0.03                           | 0.21         | -0.07                           | 1.00           | <b>0.62</b>    | <b>-0.54</b>                            | 0.06        | 0.04        | 0.16           | -0.01        | 0.09              |
| sCr, μmol/L                           | 0.23          | 0.09                            | 0.11                            | -0.04                           | 0.09         | -0.14                           | <b>0.62</b>    | 1.00           | <b>-0.89</b>                            | 0.02        | -0.11       | 0.10           | -0.07        | -0.14             |
| GFR,<br>mL/min/1.73<br>m <sup>2</sup> | <b>-0.44</b>  | -0.01                           | -0.02                           | 0.06                            | -0.06        | 0.11                            | <b>-0.54</b>   | <b>-0.89</b>   | 1.00                                    | 0.06        | 0.20        | -0.14          | 0.05         | 0.16              |
| AST, U/L                              | -0.22         | 0.15                            | 0.18                            | 0.00                            | 0.11         | -0.02                           | 0.06           | 0.02           | 0.06                                    | 1.00        | <b>0.66</b> | 0.09           | 0.07         | -0.05             |
| ALT, U/L                              | -0.27         | 0.12                            | 0.14                            | 0.04                            | 0.05         | 0.07                            | 0.04           | -0.11          | 0.20                                    | <b>0.66</b> | 1.00        | 0.09           | -0.07        | 0.00              |
| FPG, mmol/L                           | 0.07          | 0.08                            | 0.12                            | -0.20                           | 0.20         | -0.04                           | 0.16           | 0.10           | -0.14                                   | 0.09        | 0.09        | 1.00           | 0.06         | 0.01              |
| CRP, mg/L                             | -0.09         | 0.12                            | 0.19                            | -0.22                           | 0.27         | 0.07                            | -0.01          | -0.07          | 0.05                                    | 0.07        | -0.07       | 0.06           | 1.00         | 0.26              |
| D-dimer,<br>ng/mL                     | -0.07         | 0.23                            | 0.25                            | -0.06                           | 0.17         | 0.08                            | 0.09           | -0.14          | 0.16                                    | -0.05       | 0.00        | 0.01           | 0.26         | 1.00              |

**Table S3.** Classification summary and AUROC of neural networks for the prediction of fatal outcome in patients admitted to the ICU with severe COVID-19 (merged dataset from three centers). Manually selected predictors (CAD/CHF, stage 3-5 CKD, BUN, and CRP).

| Cross-validation sample |               |                    |                   |       | Average bootstrapping |                |               |                    |                   |       |       |
|-------------------------|---------------|--------------------|-------------------|-------|-----------------------|----------------|---------------|--------------------|-------------------|-------|-------|
| Neural network          | n, %          | Hospital discharge | In-hospital death | All   | AUROC                 | Neural network | n, %          | Hospital discharge | In-hospital death | All   | AUROC |
| 1                       | Total (n)     | 57                 | 47                | 104   | 0.850                 | 1              | Total (n)     | 52.25              | 51.75             | 104   | 0.823 |
|                         | Correct (n)   | 47                 | 38                | 85    |                       |                | Correct (n)   | 41.5               | 39                | 80.5  |       |
|                         | Incorrect (n) | 10                 | 9                 | 19    |                       |                | Incorrect (n) | 10.75              | 12.75             | 23.5  |       |
|                         | Correct (%)   | 82.46              | 80.85             | 81.73 |                       |                | Correct (%)   | 79.36              | 75.19             | 77.40 |       |
|                         | Incorrect (%) | 17.54              | 19.15             | 18.27 |                       |                | Incorrect (%) | 20.64              | 24.81             | 22.60 |       |
| 2                       | Total (n)     | 57                 | 47                | 104   | 0.834                 | 2              | Total (n)     | 52.25              | 51.75             | 104   | 0.804 |
|                         | Correct (n)   | 46                 | 38                | 84    |                       |                | Correct (n)   | 40                 | 39                | 79    |       |
|                         | Incorrect (n) | 11                 | 9                 | 20    |                       |                | Incorrect (n) | 12.25              | 12.75             | 25    |       |
|                         | Correct (%)   | 80.70              | 80.85             | 80.77 |                       |                | Correct (%)   | 76.49              | 75.19             | 75.96 |       |
|                         | Incorrect (%) | 19.30              | 19.15             | 19.23 |                       |                | Incorrect (%) | 23.51              | 24.81             | 24.04 |       |
| 3                       | Total (n)     | 57                 | 47                | 104   | 0.834                 | 3              | Total (n)     | 52.25              | 51.75             | 104   | 0.809 |
|                         | Correct (n)   | 42                 | 43                | 85    |                       |                | Correct (n)   | 37.25              | 47                | 84.25 |       |
|                         | Incorrect (n) | 15                 | 4                 | 19    |                       |                | Incorrect (n) | 15                 | 4.75              | 19.75 |       |
|                         | Correct (%)   | 73.68              | 91.49             | 81.73 |                       |                | Correct (%)   | 71.45              | 90.55             | 81.01 |       |
|                         | Incorrect (%) | 26.32              | 8.51              | 18.27 |                       |                | Incorrect (%) | 28.55              | 9.45              | 18.99 |       |
| 4                       | Total (n)     | 57                 | 47                | 104   | 0.846                 | 4              | Total (n)     | 52.25              | 51.75             | 104   | 0.820 |
|                         | Correct (n)   | 42                 | 43                | 85    |                       |                | Correct (n)   | 37.25              | 47                | 84.25 |       |
|                         | Incorrect (n) | 15                 | 4                 | 19    |                       |                | Incorrect (n) | 15                 | 4.75              | 19.75 |       |
|                         | Correct (%)   | 73.68              | 91.49             | 81.73 |                       |                | Correct (%)   | 71.45              | 90.55             | 81.01 |       |
|                         | Incorrect (%) | 26.32              | 8.51              | 18.27 |                       |                | Incorrect (%) | 28.55              | 9.45              | 18.99 |       |
| 5                       | Total (n)     | 57                 | 47                | 104   | 0.849                 | 5              | Total (n)     | 52.25              | 51.75             | 104   | 0.821 |
|                         | Correct (n)   | 42                 | 43                | 85    |                       |                | Correct (n)   | 37.25              | 47                | 84.25 |       |
|                         | Incorrect (n) | 15                 | 4                 | 19    |                       |                | Incorrect (n) | 15                 | 4.75              | 19.75 |       |
|                         | Correct (%)   | 73.68              | 91.49             | 81.73 |                       |                | Correct (%)   | 71.45              | 90.55             | 81.01 |       |

|    |               |       |       |       |       |    |               |       |       |       |       |
|----|---------------|-------|-------|-------|-------|----|---------------|-------|-------|-------|-------|
|    | Incorrect (%) | 26.32 | 8.51  | 18.27 |       |    | Incorrect (%) | 28.55 | 9.45  | 18.99 |       |
|    | Total (n)     | 57    | 47    | 104   |       |    | Total (n)     | 52.25 | 51.75 | 104   |       |
|    | Correct (n)   | 42    | 43    | 85    |       |    | Correct (n)   | 37.25 | 47    | 84.25 |       |
| 6  | Incorrect (n) | 15    | 4     | 19    | 0.823 | 6  | Incorrect (n) | 15    | 4.75  | 19.75 | 0.799 |
|    | Correct (%)   | 73.68 | 91.49 | 81.73 |       |    | Correct (%)   | 71.45 | 90.55 | 81.01 |       |
|    | Incorrect (%) | 26.32 | 8.51  | 18.27 |       |    | Incorrect (%) | 28.55 | 9.45  | 18.99 |       |
|    | Total (n)     | 57    | 47    | 104   |       |    | Total (n)     | 52.25 | 51.75 | 104   |       |
|    | Correct (n)   | 42    | 43    | 85    |       |    | Correct (n)   | 37.25 | 47    | 84.25 |       |
| 7  | Incorrect (n) | 15    | 4     | 19    | 0.837 | 7  | Incorrect (n) | 15    | 4.75  | 19.75 | 0.812 |
|    | Correct (%)   | 73.68 | 91.49 | 81.73 |       |    | Correct (%)   | 71.45 | 90.55 | 81.01 |       |
|    | Incorrect (%) | 26.32 | 8.51  | 18.27 |       |    | Incorrect (%) | 28.55 | 9.45  | 18.99 |       |
|    | Total (n)     | 57    | 47    | 104   |       |    | Total (n)     | 52.25 | 51.75 | 104   |       |
|    | Correct (n)   | 44    | 41    | 85    |       |    | Correct (n)   | 37.25 | 47    | 84.25 |       |
| 8  | Incorrect (n) | 13    | 6     | 19    | 0.845 | 8  | Incorrect (n) | 15    | 4.75  | 19.75 | 0.849 |
|    | Correct (%)   | 77.19 | 87.23 | 81.73 |       |    | Correct (%)   | 71.45 | 90.55 | 81.01 |       |
|    | Incorrect (%) | 22.81 | 12.77 | 18.27 |       |    | Incorrect (%) | 28.55 | 9.45  | 18.99 |       |
|    | Total (n)     | 57    | 47    | 104   |       |    | Total (n)     | 52.25 | 51.75 | 104   |       |
|    | Correct (n)   | 42    | 43    | 85    |       |    | Correct (n)   | 39.25 | 43.75 | 83    |       |
| 9  | Incorrect (n) | 15    | 4     | 19    | 0.861 | 9  | Incorrect (n) | 13    | 8     | 21    | 0.832 |
|    | Correct (%)   | 73.68 | 91.49 | 81.73 |       |    | Correct (%)   | 75.12 | 84.32 | 79.81 |       |
|    | Incorrect (%) | 26.32 | 8.51  | 18.27 |       |    | Incorrect (%) | 24.88 | 15.68 | 20.19 |       |
|    | Total (n)     | 57    | 47    | 104   |       |    | Total (n)     | 52.25 | 51.75 | 104   |       |
|    | Correct (n)   | 44    | 41    | 85    |       |    | Correct (n)   | 39.25 | 43.75 | 83    |       |
| 10 | Incorrect (n) | 13    | 6     | 19    | 0.866 | 10 | Incorrect (n) | 13    | 8     | 21    | 0.849 |
|    | Correct (%)   | 77.19 | 87.23 | 81.73 |       |    | Correct (%)   | 75.12 | 84.32 | 79.81 |       |
|    | Incorrect (%) | 22.81 | 12.77 | 18.27 |       |    | Incorrect (%) | 24.88 | 15.68 | 20.19 |       |
| 11 | Total (n)     | 57    | 47    | 104   | 0.837 | 11 | Total (n)     | 52.25 | 51.75 | 104   | 0.814 |



|    |               |       |       |       |       |    |               |       |       |       |       |  |
|----|---------------|-------|-------|-------|-------|----|---------------|-------|-------|-------|-------|--|
|    | Correct (n)   | 42    | 43    | 85    |       |    | Correct (n)   | 37.25 | 47    | 84.25 |       |  |
|    | Incorrect (n) | 15    | 4     | 19    |       |    | Incorrect (n) | 15    | 4.75  | 19.75 |       |  |
|    | Correct (%)   | 73.68 | 91.49 | 81.73 |       |    | Correct (%)   | 71.45 | 90.55 | 81.01 |       |  |
|    | Incorrect (%) | 26.32 | 8.51  | 18.27 |       |    | Incorrect (%) | 28.55 | 9.45  | 18.99 |       |  |
|    | Total (n)     | 57    | 47    | 104   |       |    | Total (n)     | 52.25 | 51.75 | 104   |       |  |
| 12 | Correct (n)   | 42    | 43    | 85    | 0.853 | 12 | Correct (n)   | 37.25 | 47    | 84.25 | 0.835 |  |
|    | Incorrect (n) | 15    | 4     | 19    |       |    | Incorrect (n) | 15    | 4.75  | 19.75 |       |  |
|    | Correct (%)   | 73.68 | 91.49 | 81.73 |       |    | Correct (%)   | 71.45 | 90.55 | 81.01 |       |  |
|    | Incorrect (%) | 26.32 | 8.51  | 18.27 |       |    | Incorrect (%) | 28.55 | 9.45  | 18.99 |       |  |
|    | Total (n)     | 57    | 47    | 104   |       |    | Total (n)     | 52.25 | 51.75 | 104   |       |  |
| 13 | Correct (n)   | 42    | 43    | 85    | 0.842 | 13 | Correct (n)   | 37.25 | 47    | 84.25 | 0.819 |  |
|    | Incorrect (n) | 15    | 4     | 19    |       |    | Incorrect (n) | 15    | 4.75  | 19.75 |       |  |
|    | Correct (%)   | 73.68 | 91.49 | 81.73 |       |    | Correct (%)   | 71.45 | 90.55 | 81.01 |       |  |
|    | Incorrect (%) | 26.32 | 8.51  | 18.27 |       |    | Incorrect (%) | 28.55 | 9.45  | 18.99 |       |  |
|    | Total (n)     | 57    | 47    | 104   |       |    | Total (n)     | 52.25 | 51.75 | 104   |       |  |
| 14 | Correct (n)   | 46    | 38    | 84    | 0.839 | 14 | Correct (n)   | 40    | 39    | 79    | 0.809 |  |
|    | Incorrect (n) | 11    | 9     | 20    |       |    | Incorrect (n) | 12.25 | 12.75 | 25    |       |  |
|    | Correct (%)   | 80.70 | 80.85 | 80.77 |       |    | Correct (%)   | 76.63 | 75.19 | 75.96 |       |  |
|    | Incorrect (%) | 19.30 | 19.15 | 19.23 |       |    | Incorrect (%) | 23.37 | 24.81 | 24.04 |       |  |
|    | Total (n)     | 57    | 47    | 104   |       |    | Total (n)     | 52.25 | 51.75 | 104   |       |  |
| 15 | Correct (n)   | 42    | 43    | 85    | 0.825 | 15 | Correct (n)   | 37.25 | 47    | 84.25 | 0.808 |  |
|    | Incorrect (n) | 15    | 4     | 19    |       |    | Incorrect (n) | 15    | 4.75  | 19.75 |       |  |
|    | Correct (%)   | 73.68 | 91.49 | 81.73 |       |    | Correct (%)   | 71.45 | 90.55 | 81.01 |       |  |
|    | Incorrect (%) | 26.32 | 8.51  | 18.27 |       |    | Incorrect (%) | 28.55 | 9.45  | 18.99 |       |  |
|    | Total (n)     | 57    | 47    | 104   |       |    | Total (n)     | 52.25 | 51.75 | 104   |       |  |

**Table S4.** Classification summary and AUROC of neural networks for the prediction of fatal outcome in patients admitted to the ICU with severe COVID-19 (merged dataset from three centers). Predictors identified by Predictor Screening tool of STATISTICA software (CAD/CHF, LY#, NLR, and CRP).

| Cross-validation sample |               |                    |                   |       |       | Average bootstrapping |               |                    |                   |       |       |
|-------------------------|---------------|--------------------|-------------------|-------|-------|-----------------------|---------------|--------------------|-------------------|-------|-------|
| Neural network          | n, %          | Hospital discharge | In-hospital death | All   | AUROC | Neural network        | n, %          | Hospital discharge | In-hospital death | All   | AUROC |
| 1                       | Total (n)     | 57                 | 47                | 104   | 0.820 | 1                     | Total (n)     | 52                 | 52                | 104   | 0.775 |
|                         | Correct (n)   | 46                 | 38                | 84    |       |                       | Correct (n)   | 41                 | 39                | 79    |       |
|                         | Incorrect (n) | 11                 | 9                 | 20    |       |                       | Incorrect (n) | 12                 | 13                | 25    |       |
|                         | Correct (%)   | 80.70              | 80.85             | 80.77 |       |                       | Correct (%)   | 77.47              | 74.85             | 76.20 |       |
|                         | Incorrect (%) | 19.30              | 19.15             | 19.23 |       |                       | Incorrect (%) | 22.53              | 25.15             | 23.80 |       |
| 2                       | Total (n)     | 57                 | 47                | 104   | 0.824 | 2                     | Total (n)     | 52                 | 52                | 104   | 0.778 |
|                         | Correct (n)   | 47                 | 37                | 84    |       |                       | Correct (n)   | 42                 | 38                | 79    |       |
|                         | Incorrect (n) | 10                 | 10                | 20    |       |                       | Incorrect (n) | 11                 | 14                | 25    |       |
|                         | Correct (%)   | 82.46              | 78.72             | 80.77 |       |                       | Correct (%)   | 79.38              | 72.35             | 75.96 |       |
|                         | Incorrect (%) | 17.54              | 21.28             | 19.23 |       |                       | Incorrect (%) | 20.62              | 27.65             | 24.04 |       |
| 3                       | Total (n)     | 57                 | 47                | 104   | 0.815 | 3                     | Total (n)     | 52                 | 52                | 104   | 0.770 |
|                         | Correct (n)   | 46                 | 38                | 84    |       |                       | Correct (n)   | 40                 | 39                | 78    |       |
|                         | Incorrect (n) | 11                 | 9                 | 20    |       |                       | Incorrect (n) | 13                 | 13                | 26    |       |
|                         | Correct (%)   | 80.70              | 80.85             | 80.77 |       |                       | Correct (%)   | 75.57              | 74.85             | 75.24 |       |
|                         | Incorrect (%) | 19.30              | 19.15             | 19.23 |       |                       | Incorrect (%) | 24.43              | 25.15             | 24.76 |       |
| 4                       | Total (n)     | 57                 | 47                | 104   | 0.817 | 4                     | Total (n)     | 52                 | 52                | 104   | 0.772 |
|                         | Correct (n)   | 46                 | 38                | 84    |       |                       | Correct (n)   | 40                 | 39                | 78    |       |
|                         | Incorrect (n) | 11                 | 9                 | 20    |       |                       | Incorrect (n) | 13                 | 13                | 26    |       |
|                         | Correct (%)   | 80.70              | 80.85             | 80.77 |       |                       | Correct (%)   | 75.57              | 74.85             | 75.24 |       |
|                         | Incorrect (%) | 19.30              | 19.15             | 19.23 |       |                       | Incorrect (%) | 24.43              | 25.15             | 24.76 |       |
| 5                       | Total (n)     | 57                 | 47                | 104   | 0.815 | 5                     | Total (n)     | 52                 | 52                | 104   | 0.779 |
|                         | Correct (n)   | 46                 | 39                | 85    |       |                       | Correct (n)   | 42                 | 40                | 82    |       |
|                         | Incorrect (n) | 11                 | 8                 | 19    |       |                       | Incorrect (n) | 10                 | 12                | 22    |       |
|                         | Correct (%)   | 80.70              | 82.98             | 81.73 |       |                       | Correct (%)   | 80.50              | 77.26             | 78.85 |       |
|                         | Incorrect (%) | 19.30              | 17.02             | 18.27 |       |                       | Incorrect (%) | 19.50              | 22.74             | 21.15 |       |
| 6                       | Total (n)     | 57                 | 47                | 104   | 0.819 | 6                     | Total (n)     | 52                 | 52                | 104   | 0.773 |
|                         | Correct (n)   | 46                 | 38                | 84    |       |                       | Correct (n)   | 40                 | 39                | 78    |       |
|                         | Incorrect (n) | 11                 | 9                 | 20    |       |                       | Incorrect (n) | 13                 | 13                | 26    |       |
|                         | Correct (%)   | 80.70              | 80.85             | 80.77 |       |                       | Correct (%)   | 75.57              | 74.85             | 75.24 |       |
|                         | Incorrect (%) | 19.30              | 19.15             | 19.23 |       |                       | Incorrect (%) | 24.43              | 25.15             | 24.76 |       |
| 7                       | Total (n)     | 57                 | 47                | 104   | 0.818 | 7                     | Total (n)     | 52                 | 52                | 104   | 0.773 |

|    |               |       |       |       |       |    |               |       |       |       |       |  |
|----|---------------|-------|-------|-------|-------|----|---------------|-------|-------|-------|-------|--|
|    | Correct (n)   | 46    | 38    | 84    |       |    | Correct (n)   | 40    | 39    | 78    |       |  |
|    | Incorrect (n) | 11    | 9     | 20    |       |    | Incorrect (n) | 13    | 13    | 26    |       |  |
|    | Correct (%)   | 80.70 | 80.85 | 80.77 |       |    | Correct (%)   | 75.57 | 74.85 | 75.24 |       |  |
|    | Incorrect (%) | 19.30 | 19.15 | 19.23 |       |    | Incorrect (%) | 24.43 | 25.15 | 24.76 |       |  |
|    | Total (n)     | 57    | 47    | 104   |       |    | Total (n)     | 52    | 52    | 104   |       |  |
| 8  | Correct (n)   | 47    | 38    | 85    | 0.820 | 8  | Correct (n)   | 41    | 39    | 80    | 0.775 |  |
|    | Incorrect (n) | 10    | 9     | 19    |       |    | Incorrect (n) | 11    | 13    | 24    |       |  |
|    | Correct (%)   | 82.46 | 80.85 | 81.73 |       |    | Correct (%)   | 78.98 | 74.85 | 76.92 |       |  |
|    | Incorrect (%) | 17.54 | 19.15 | 18.27 |       |    | Incorrect (%) | 21.02 | 25.15 | 23.08 |       |  |
|    | Total (n)     | 57    | 47    | 104   |       |    | Total (n)     | 52    | 52    | 104   |       |  |
| 9  | Correct (n)   | 47    | 38    | 85    | 0.817 | 9  | Correct (n)   | 41    | 39    | 80    | 0.769 |  |
|    | Incorrect (n) | 10    | 9     | 19    |       |    | Incorrect (n) | 11    | 13    | 24    |       |  |
|    | Correct (%)   | 82.46 | 80.85 | 81.73 |       |    | Correct (%)   | 78.34 | 74.85 | 76.68 |       |  |
|    | Incorrect (%) | 17.54 | 19.15 | 18.27 |       |    | Incorrect (%) | 21.66 | 25.15 | 23.32 |       |  |
|    | Total (n)     | 57    | 47    | 104   |       |    | Total (n)     | 52    | 52    | 104   |       |  |
| 10 | Correct (n)   | 47    | 37    | 84    | 0.817 | 10 | Correct (n)   | 41    | 38    | 79    | 0.772 |  |
|    | Incorrect (n) | 10    | 10    | 20    |       |    | Incorrect (n) | 11    | 14    | 25    |       |  |
|    | Correct (%)   | 82.46 | 78.72 | 80.77 |       |    | Correct (%)   | 78.98 | 73.35 | 76.20 |       |  |
|    | Incorrect (%) | 17.54 | 21.28 | 19.23 |       |    | Incorrect (%) | 21.02 | 26.65 | 23.80 |       |  |
|    | Total (n)     | 57    | 47    | 104   |       |    | Total (n)     | 52    | 52    | 104   |       |  |

**Table S5.** Classification summary and AUROC of neural networks for the prediction of fatal outcome in patients admitted to the ICU with severe COVID-19 (merged dataset from three centers). Predictors combined from the manual screening and Predictor Screening tool of STATISTICA software (CAD/CHF, stage 3-5 CKD, BUN, LY#, NLR, and CRP).

| Cross-validation sample |               |                    |                   |       | AUROC |
|-------------------------|---------------|--------------------|-------------------|-------|-------|
| Neural network          | n, %          | Hospital discharge | In-hospital death | All   |       |
| 1                       | Total (n)     | 57                 | 47                | 104   | 0.838 |
|                         | Correct (n)   | 46                 | 39                | 85    |       |
|                         | Incorrect (n) | 11                 | 8                 | 19    |       |
|                         | Correct (%)   | 80.70              | 82.98             | 81.73 |       |
|                         | Incorrect (%) | 19.30              | 17.02             | 18.27 |       |
| 2                       | Total (n)     | 57                 | 47                | 104   | 0.832 |
|                         | Correct (n)   | 47                 | 38                | 85    |       |
|                         | Incorrect (n) | 10                 | 9                 | 19    |       |
|                         | Correct (%)   | 82.46              | 80.85             | 81.73 |       |
|                         | Incorrect (%) | 17.54              | 19.15             | 18.27 |       |
| 3                       | Total (n)     | 57                 | 47                | 104   | 0.836 |
|                         | Correct (n)   | 47                 | 38                | 85    |       |
|                         | Incorrect (n) | 10                 | 9                 | 19    |       |
|                         | Correct (%)   | 82.46              | 80.85             | 81.73 |       |
|                         | Incorrect (%) | 17.54              | 19.15             | 18.27 |       |
| 4                       | Total (n)     | 57                 | 47                | 104   | 0.831 |
|                         | Correct (n)   | 47                 | 38                | 85    |       |
|                         | Incorrect (n) | 10                 | 9                 | 19    |       |
|                         | Correct (%)   | 82.46              | 80.85             | 81.73 |       |
|                         | Incorrect (%) | 17.54              | 19.15             | 18.27 |       |
| 5                       | Total (n)     | 57                 | 47                | 104   | 0.824 |
|                         | Correct (n)   | 46                 | 39                | 85    |       |
|                         | Incorrect (n) | 11                 | 8                 | 19    |       |
|                         | Correct (%)   | 80.70              | 82.98             | 81.73 |       |
|                         | Incorrect (%) | 19.30              | 17.02             | 18.27 |       |
| 6                       | Total (n)     | 57                 | 47                | 104   | 0.835 |
|                         | Correct (n)   | 47                 | 38                | 85    |       |
|                         | Incorrect (n) | 10                 | 9                 | 19    |       |
|                         | Correct (%)   | 82.46              | 80.85             | 81.73 |       |
|                         | Incorrect (%) | 17.54              | 19.15             | 18.27 |       |
| 7                       | Total (n)     | 57                 | 47                | 104   | 0.825 |
|                         | Correct (n)   | 47                 | 38                | 85    |       |
|                         | Incorrect (n) | 10                 | 9                 | 19    |       |
|                         | Correct (%)   | 82.46              | 80.85             | 81.73 |       |
|                         | Incorrect (%) | 17.54              | 19.15             | 18.27 |       |
| 8                       | Total (n)     | 57                 | 47                | 104   | 0.831 |
|                         | Correct (n)   | 47                 | 38                | 85    |       |
|                         | Incorrect (n) | 10                 | 9                 | 19    |       |
|                         | Correct (%)   | 82.46              | 80.85             | 81.73 |       |
|                         | Incorrect (%) | 17.54              | 19.15             | 18.27 |       |
| 9                       | Total (n)     | 57                 | 47                | 104   | 0.833 |
|                         | Correct (n)   | 47                 | 38                | 85    |       |
|                         | Incorrect (n) | 10                 | 9                 | 19    |       |
|                         | Correct (%)   | 82.46              | 80.85             | 81.73 |       |

|    |               |       |       |       |       |
|----|---------------|-------|-------|-------|-------|
| 10 | Incorrect (%) | 17.54 | 19.15 | 18.27 | 0.832 |
|    | Total (n)     | 57    | 47    | 104   |       |
|    | Correct (n)   | 47    | 38    | 85    |       |
|    | Incorrect (n) | 10    | 9     | 19    |       |
|    | Correct (%)   | 82.46 | 80.85 | 81.73 |       |
|    | Incorrect (%) | 17.54 | 19.15 | 18.27 |       |
| 11 | Total (n)     | 57    | 47    | 104   | 0.830 |
|    | Correct (n)   | 47    | 38    | 85    |       |
|    | Incorrect (n) | 10    | 9     | 19    |       |
|    | Correct (%)   | 82.46 | 80.85 | 81.73 |       |
|    | Incorrect (%) | 17.54 | 19.15 | 18.27 |       |
|    | Total (n)     | 57    | 47    | 104   |       |
| 12 | Correct (n)   | 47    | 38    | 85    | 0.827 |
|    | Incorrect (n) | 10    | 9     | 19    |       |
|    | Correct (%)   | 82.46 | 80.85 | 81.73 |       |
|    | Incorrect (%) | 17.54 | 19.15 | 18.27 |       |
|    | Total (n)     | 57    | 47    | 104   |       |
|    | Correct (n)   | 47    | 38    | 85    |       |
| 13 | Incorrect (n) | 10    | 9     | 19    | 0.832 |
|    | Correct (%)   | 82.46 | 80.85 | 81.73 |       |
|    | Incorrect (%) | 17.54 | 19.15 | 18.27 |       |
|    | Total (n)     | 57    | 47    | 104   |       |
|    | Correct (n)   | 47    | 38    | 85    |       |
|    | Incorrect (n) | 10    | 9     | 19    |       |
| 14 | Correct (%)   | 80.70 | 82.98 | 81.73 | 0.835 |
|    | Incorrect (%) | 19.30 | 17.02 | 18.27 |       |
|    | Total (n)     | 57    | 47    | 104   |       |
|    | Correct (n)   | 47    | 38    | 85    |       |
|    | Incorrect (n) | 10    | 9     | 19    |       |
|    | Correct (%)   | 82.46 | 80.85 | 81.73 |       |
| 15 | Incorrect (%) | 17.54 | 19.15 | 18.27 | 0.825 |
|    | Total (n)     | 57    | 47    | 104   |       |
|    | Correct (n)   | 47    | 38    | 85    |       |
|    | Incorrect (n) | 10    | 9     | 19    |       |
|    | Correct (%)   | 82.46 | 80.85 | 81.73 |       |
|    | Incorrect (%) | 17.54 | 19.15 | 18.27 |       |
